# Supplementary material for: METTL3 Inhibitors for Epitranscriptomic Modulation of Cellular Processes
Source: PubMed Central journal article supplement — ChemMedChem. 2021 Jul 29;16(19):3035–43. doi: 10.1002/cmdc.202100291 (PMC8518639; doi:10.1002/cmdc.202100291), 2021-07-29
Supplement: CMDC-16-3035-s001.pdf [file CMDC-16-3035-s001.pdf]

# ChemMedChem

Supporting Information

## **METTL3 Inhibitors for Epitranscriptomic Modulation of Cellular Processes**

Elena V. Moroz-Omori<sup>+,\*</sup> Danzhi Huang<sup>+</sup>, Rajiv Kumar Bedi, Sherry J. Cheriyaunkunel, Elena Bochenkova, Aymeric Dolbois, Maciej D. Rzczkowski, Yaozong Li, Lars Wiedmer, and Amedeo Caflisch<sup>\*</sup>

|                                                              |           |
|--------------------------------------------------------------|-----------|
| <b>Synthetic procedures.....</b>                             | <b>2</b>  |
| <b>Materials.....</b>                                        | <b>11</b> |
| <b>X-ray data collection and refinement statistics .....</b> | <b>12</b> |

## Synthetic procedures

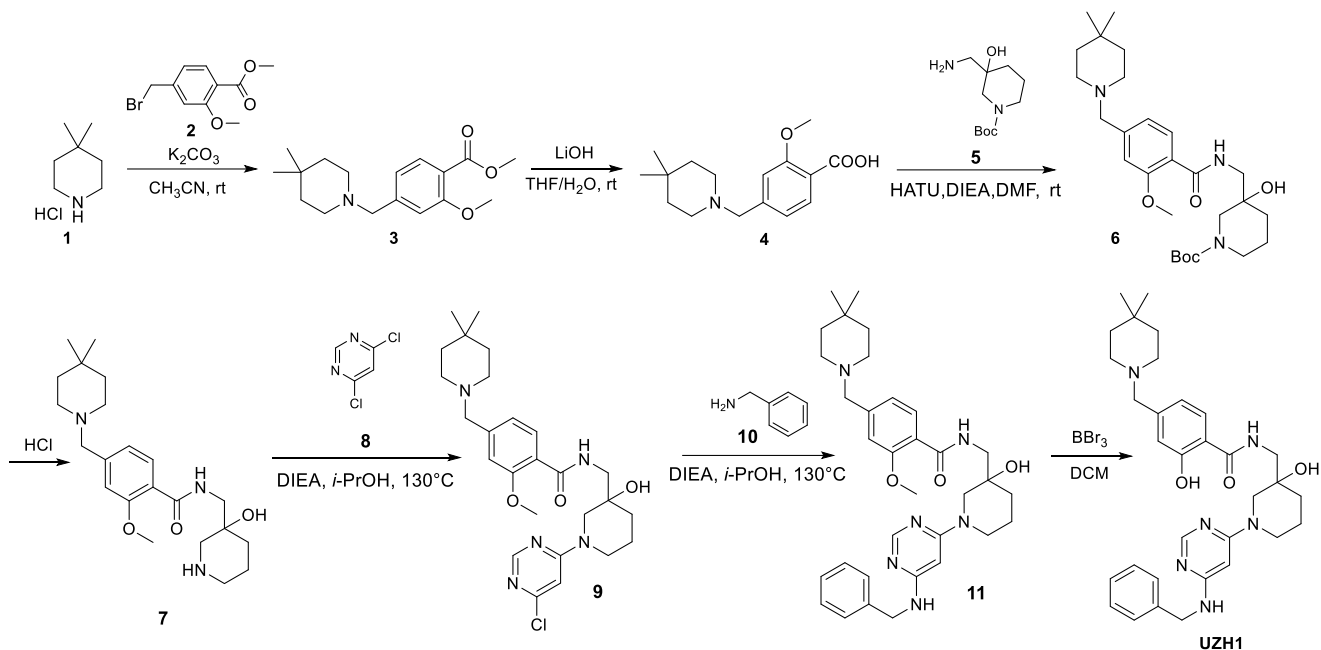

### Synthesis of compound 3

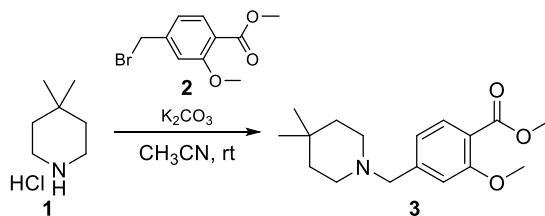

To a solution of 4,4-dimethylpiperidine hydrochloride (350 mg, 2.34 mmol) in  $CH_3CN$  (10 ml) was added methyl 4-(bromomethyl)-2-methoxybenzoate (666 mg; 2.57 mmol) and  $K_2CO_3$  (646 mg, 4.68 mmol), then the mixture was stirred at 25 °C for 16 h. The mixture was washed with water (20 mL) and extracted with EtOAc (20 mL  $\times$  3), and combined organic layers were dried over anhydrous  $Na_2SO_4$ , filtered, and concentrated. The residue was purified by column chromatography on silica gel (0-10% EtOAc in petroleum ether) to give methyl 4-((4,4-dimethylpiperidin-1-yl)methyl)-2-methoxybenzoate as a white solid (500 mg, yield: 73%).

### Synthesis of compound 4

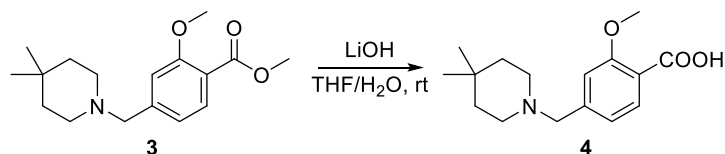

To a solution of methyl 4-((4,4-dimethylpiperidin-1-yl)methyl)-2-methoxybenzoate (500 mg, 1.72 mmol) in  $THF/H_2O$  (10 mL; 5/1) was added  $LiOH$  (123 mg, 5.15 mmol), the mixture was stirred at 25 °C for 16 h. The mixture was adjusted by 1 M HCl to pH 3, then extracted with EtOAc (20 mL  $\times$  3), and combined organic layers were dried over anhydrous  $Na_2SO_4$ , filtered and concentrated to give desired product 4-((4,4-dimethylpiperidin-1-yl)methyl)benzoic acid as a white solid (470 mg, crude).

### Synthesis of compound 6

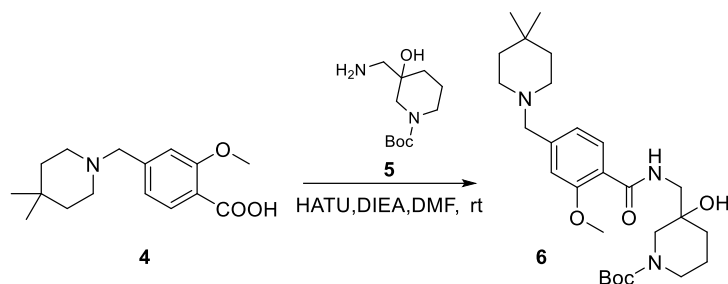

To a solution of 4-((4,4-dimethylpiperidin-1-yl)methyl)-2-methoxybenzoic acid (470 mg, 1.69 mmol) in DMF (10 mL) was added *tert*-butyl 3-(aminomethyl)-3-hydroxypiperidine-1-carboxylate (390 mg, 1.69 mmol) and HATU (773 mg, 2.03 mmol) and DIEA (0.56 mL; 3.39 mmol), then the mixture was stirred at 25 °C for 16 h under N<sub>2</sub>. The mixture was concentrated, washed with water (20 mL), extracted with EtOAc (20 mL × 3), and combined organic layers were dried over anhydrous Na<sub>2</sub>SO<sub>4</sub>, filtered and concentrated. The residue was purified by column chromatography on silica gel (0-5% MeOH in DCM) to give the product *tert*-butyl 3-((4-((4,4-dimethylpiperidin-1-yl)methyl)-2-methoxybenzamido)methyl)-3-hydroxypiperidine-1-carboxylate as yellow oil (560 mg, yield: 67%).

### Synthesis of compound 7

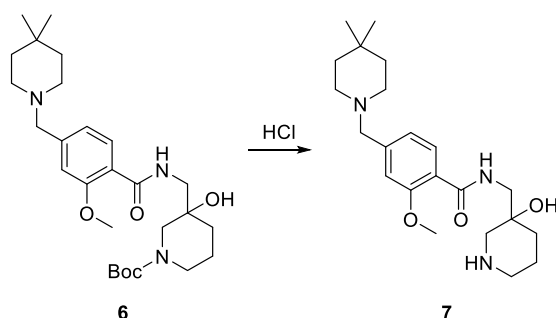

To a solution of *tert*-butyl 3-((4-((4,4-dimethylpiperidin-1-yl)methyl)-2-methoxybenzamido)methyl)-3-hydroxypiperidine-1-carboxylate (560 mg, 1.14 mmol) in DCM (5 mL) was added 3 M HCl in MeOH (1.9 mL; 5.7 mmol), and the mixture was stirred at 25 °C for 16 h. The mixture was concentrated to give desired product 4-((4,4-dimethylpiperidin-1-yl)methyl)-*N*-((3-hydroxypiperidin-3-yl)methyl)-2-methoxybenzamide as yellow oil. (600 mg, crude).

### Synthesis of compound 9

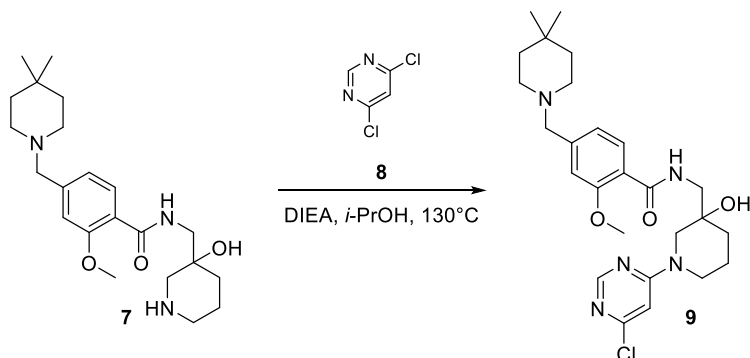

To a solution of 4-((4,4-dimethylpiperidin-1-yl)methyl)-*N*-((3-hydroxypiperidin-3-yl)methyl)-2-methoxybenzamide (680 mg; 1.62 mmol) in *i*-PrOH (10 mL) was added 4,6-dichloropyrimidine (265 mg; 1.78 mmol) and DIEA (0.80 mL; 4.85 mmol). The mixture was stirred at 130°C for 16 h under N<sub>2</sub>. The mixture was concentrated, and the residue was purified by column chromatography on silica gel (0-5% MeOH in DCM) to give the product *N*-((1-(6-chloropyrimidin-4-yl)-3-hydroxypiperidin-3-yl)methyl)-4-((4,4-dimethylpiperidin-1-yl)methyl)-2-methoxybenzamide as yellow oil (130 mg, yield: 16%).

### Synthesis of compound **11**

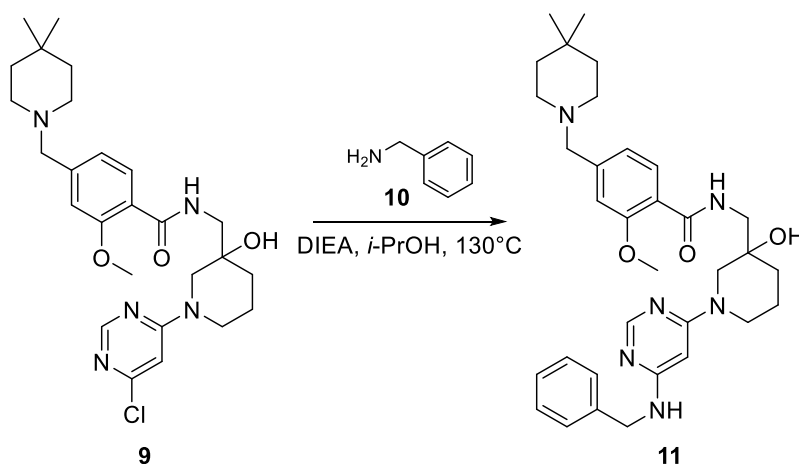

To a solution of *N*-((1-(6-chloropyrimidin-4-yl)-3-hydroxypiperidin-3-yl)methyl)-4-((4,4-dimethylpiperidin-1-yl)methyl)-2-methoxybenzamide (130 mg; 0.26 mmol) in *i*-PrOH (3 mL) was added benzylamine (31  $\mu$ L; 0.28 mmol) and DIEA (0.12 mL; 0.77 mmol). The mixture was stirred at 130°C for 16 h under N<sub>2</sub>. The mixture was concentrated and the residue was purified by column chromatography on silica gel (0-8% MeOH in DCM) to give the product *N*-((1-(6-(benzylamino)pyrimidin-4-yl)-3-hydroxypiperidin-3-yl)methyl)-4-((4,4-dimethylpiperidin-1-yl)methyl)-2-methoxybenzamide as yellow oil (75 mg, yield: 50%).

### Synthesis of compound **UZH1** (racemic)

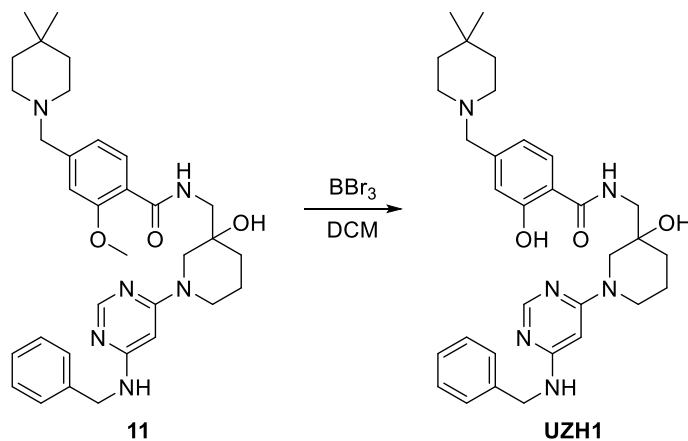

To a solution of *N*-((1-(6-(benzylamino)pyrimidin-4-yl)-3-hydroxypiperidin-3-yl)methyl)-4-((4,4-dimethylpiperidin-1-yl)methyl)-2-methoxybenzamide (75 mg; 0.13 mmol) in DCM (2 mL) was added 1 M BBr<sub>3</sub> in DCM (0.39 mL; 0.39 mmol) at 0°C. The mixture was stirred at 25°C for 16 h under N<sub>2</sub>. The mixture was concentrated and purified by

HPLC to give the desired product **N-((1-(6-(benzylamino)pyrimidin-4-yl)-3-hydroxypiperidin-3-yl)methyl)-4-((4,4-dimethylpiperidin-1-yl)methyl)-2-hydroxybenzamide** as a white solid (24 mg; yield: 32%). The separation of **UZH1** enantiomers was conducted *via* preparative HPLC on a chiral column to give **UZH1a** and **UZH1b**, both as a white solid (purity over 99.5%). It is important to note that the cellular potency of the compounds was crucially affected by their purity, and high degree of purity was required to observe the difference in cellular toxicity between **UZH1a** and **UZH1b**.

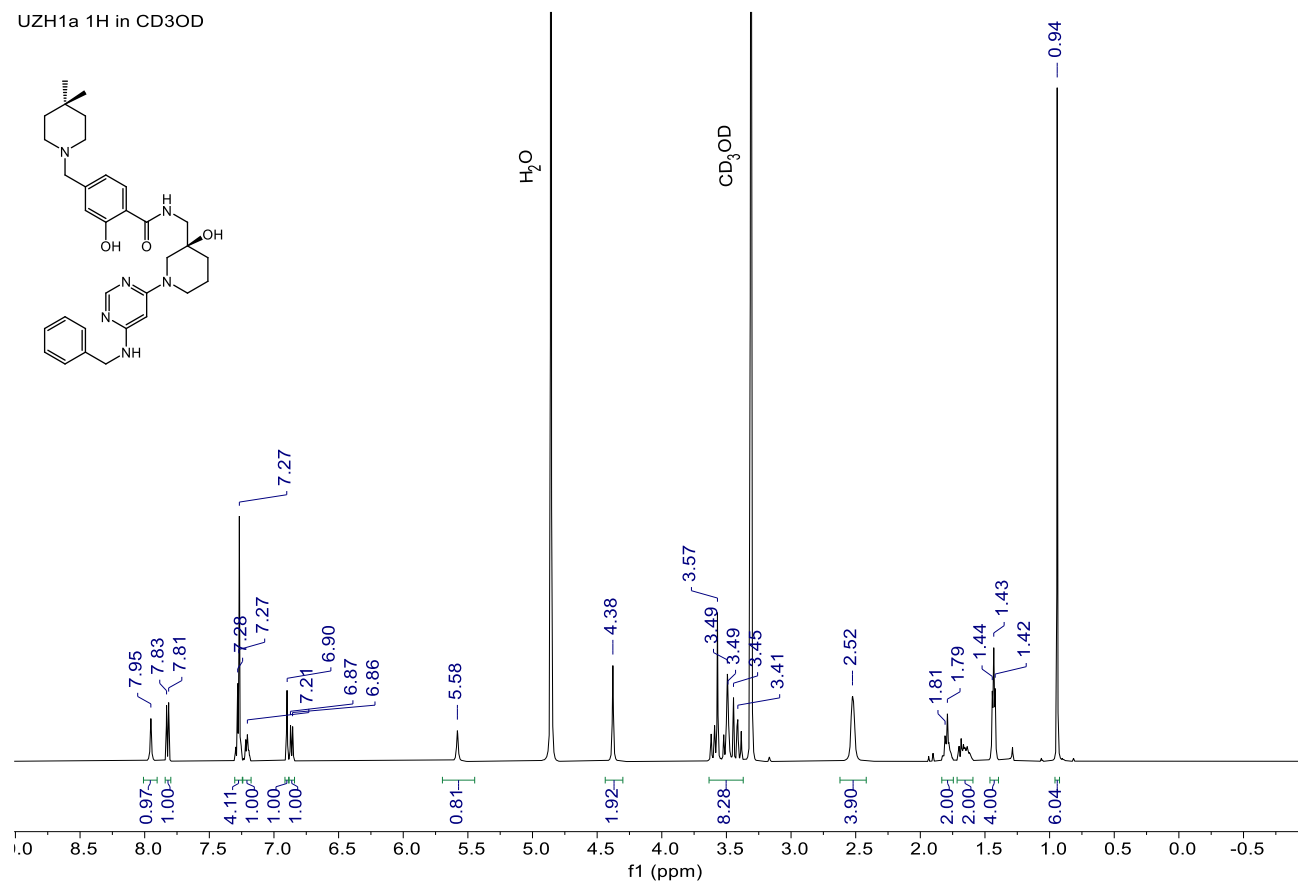

UZH1a 13C in CD3OD

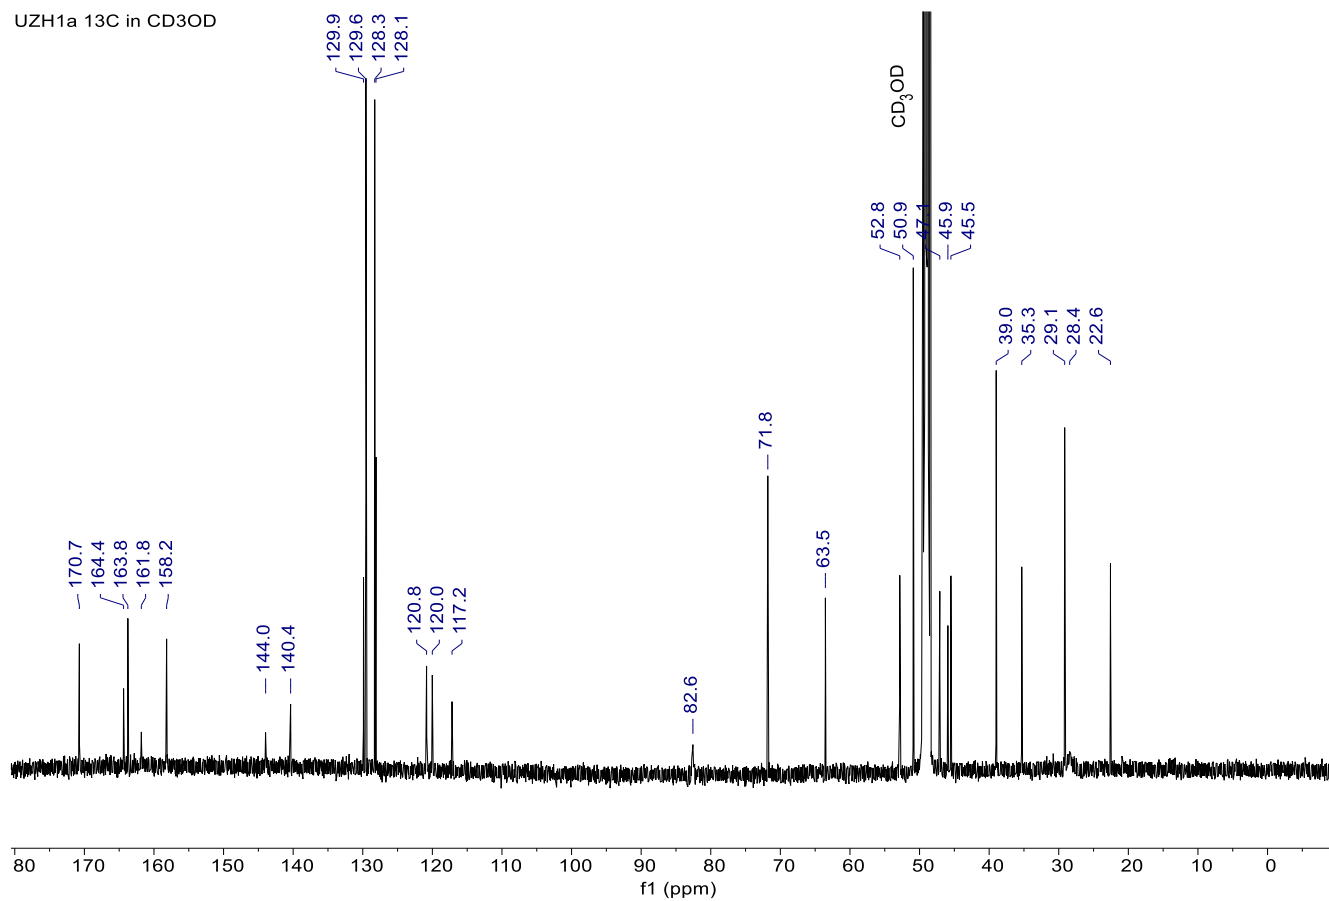

UZH1b 1H in CD3OD

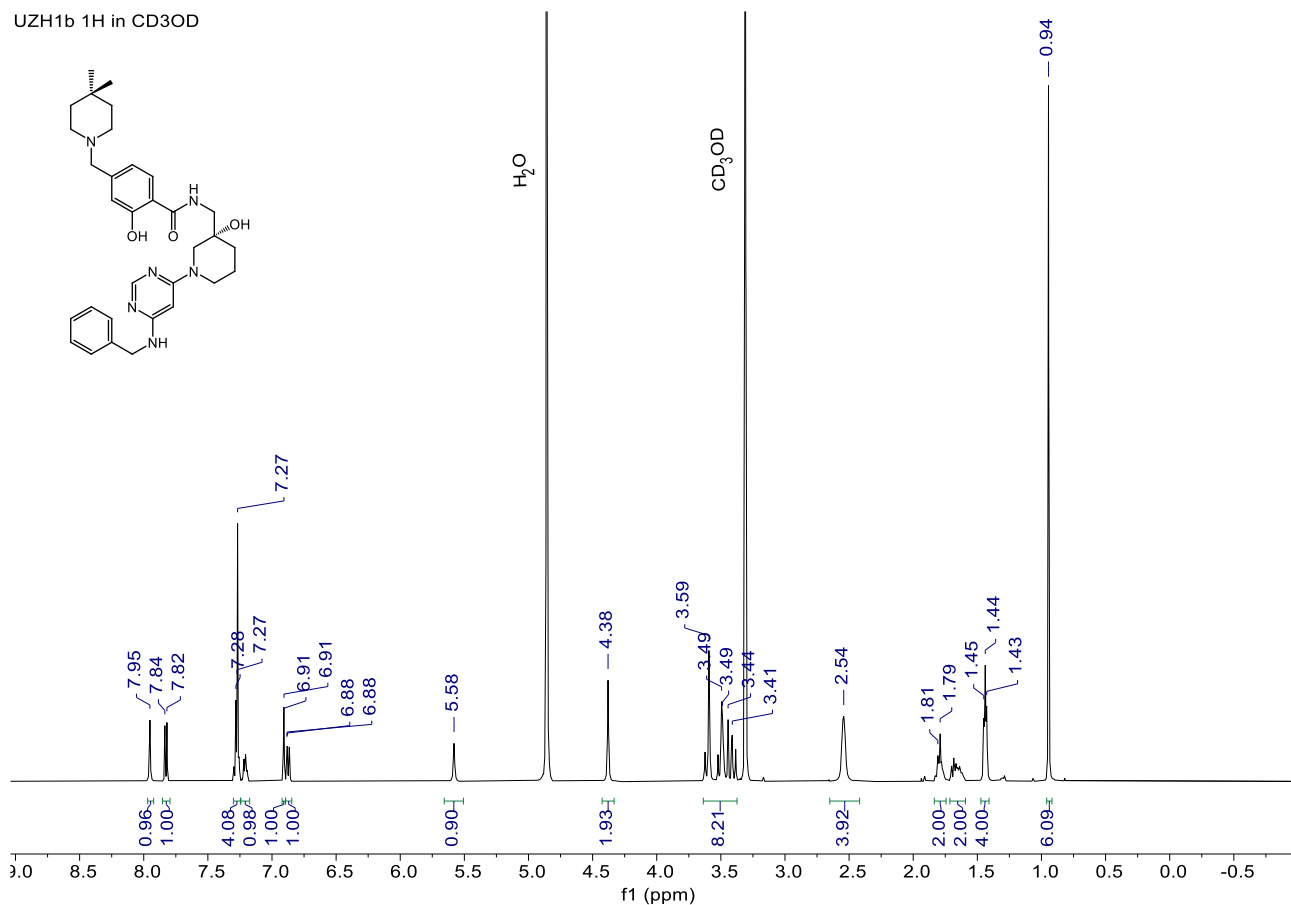

UZH1b 13C in CD3OD

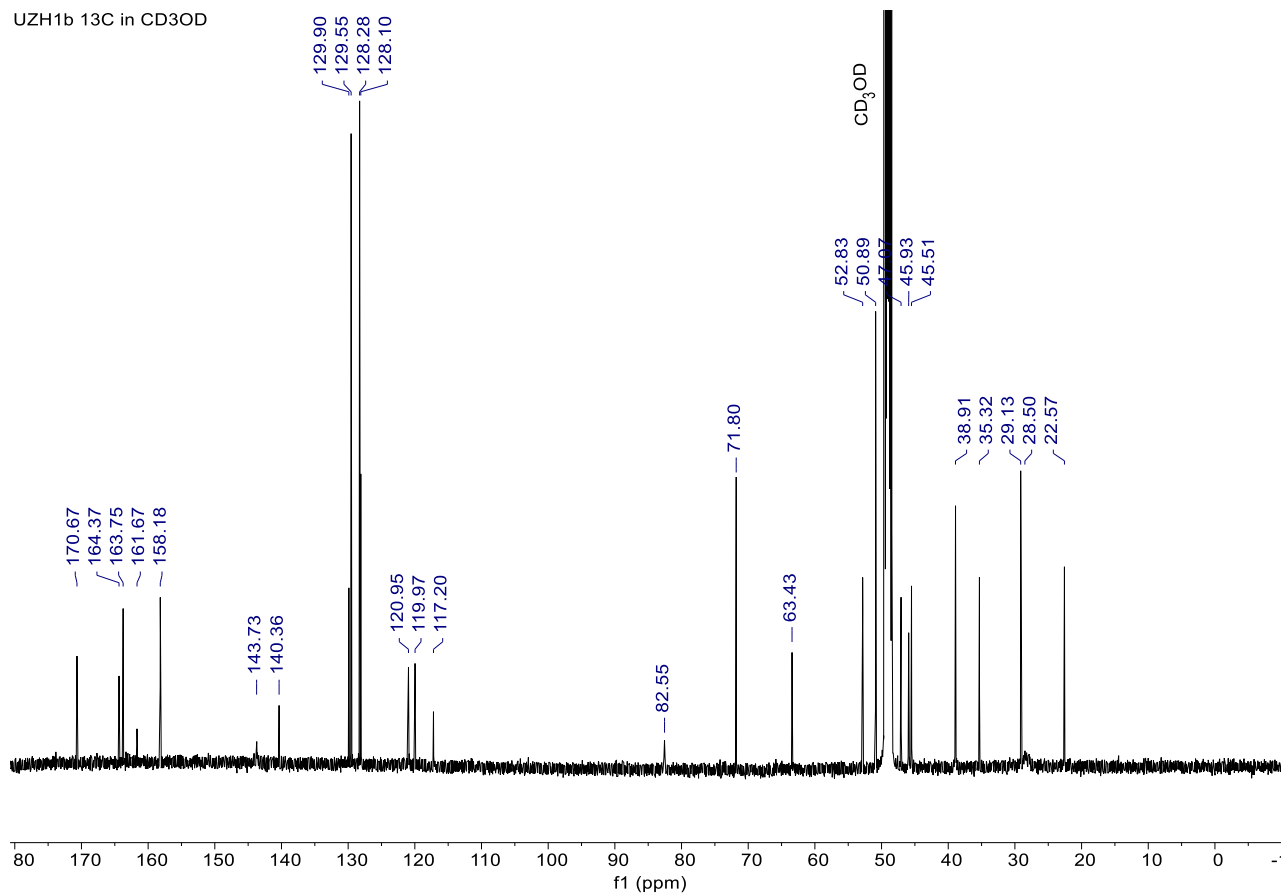



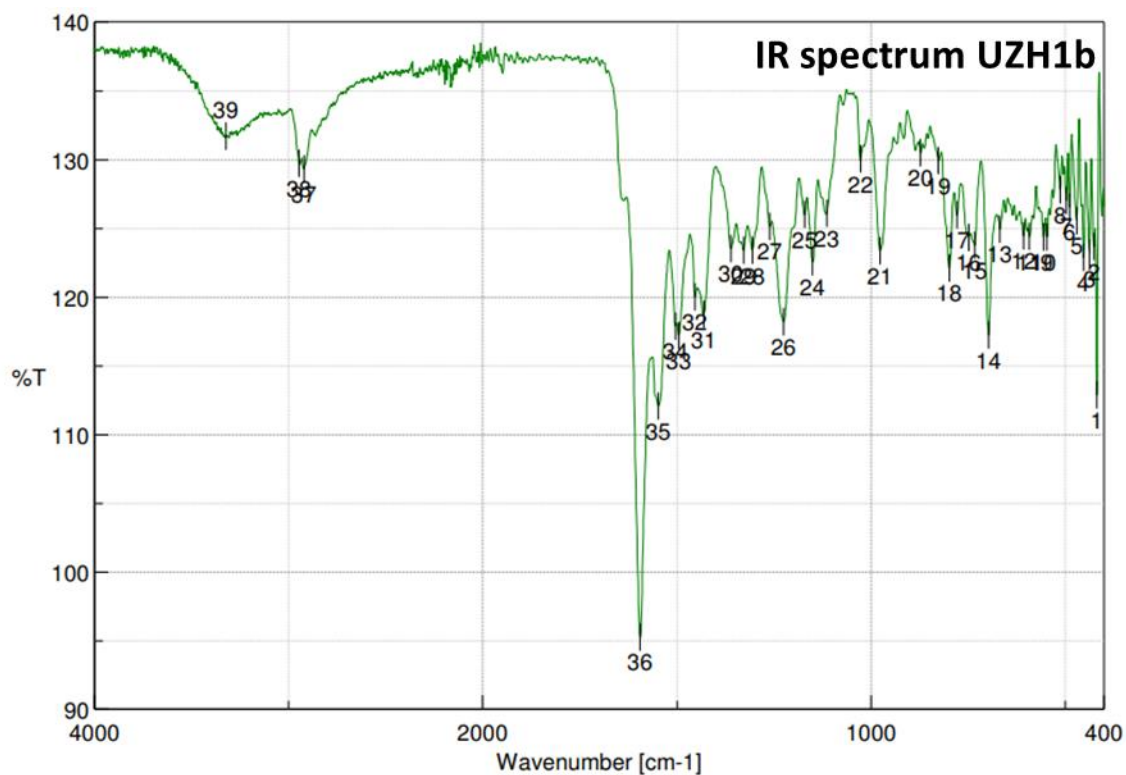

| Result of Peak Picking |          |           |     | [Comment] |           |
|------------------------|----------|-----------|-----|-----------|-----------|
| No.                    | Position | Intensity | No. | Position  | Intensity |
| 1                      | 418.5    | 112.9     | 2   | 426.2     | 123.7     |
| 3                      | 437.8    | 123.2     | 4   | 452.2     | 122.9     |
| 5                      | 470.5    | 125.5     | 6   | 487.9     | 126.5     |
| 7                      | 497.5    | 127.0     | 8   | 513.0     | 127.8     |
| 9                      | 546.7    | 124.4     | 10  | 555.4     | 124.4     |
| 11                     | 592.0    | 124.4     | 12  | 607.5     | 124.5     |
| 13                     | 668.2    | 124.9     | 14  | 697.1     | 117.2     |
| 15                     | 732.8    | 123.7     | 16  | 748.2     | 124.3     |
| 17                     | 778.1    | 126.0     | 18  | 798.4     | 122.1     |
| 19                     | 826.3    | 129.9     | 20  | 872.6     | 130.5     |
| 21                     | 976.8    | 123.4     | 22  | 1026.9    | 130.0     |
| 23                     | 1113.7   | 126.1     | 24  | 1150.3    | 122.5     |
| 25                     | 1170.6   | 126.0     | 26  | 1225.5    | 118.2     |
| 27                     | 1260.3   | 125.1     | 28  | 1305.6    | 123.4     |
| 29                     | 1328.7   | 123.4     | 30  | 1361.5    | 123.5     |
| 31                     | 1430.9   | 118.8     | 32  | 1453.1    | 120.0     |
| 33                     | 1495.5   | 117.2     | 34  | 1504.2    | 117.9     |
| 35                     | 1547.6   | 112.1     | 36  | 1594.8    | 95.2      |
| 37                     | 2921.6   | 129.3     | 38  | 2947.7    | 129.7     |
| 39                     | 3322.7   | 131.7     |     |           |           |

  

| [Measurement Information] |                      |
|---------------------------|----------------------|
| Sample Name               | University of Zurich |
| Comment                   |                      |
| User                      |                      |
| Division                  |                      |
| Company                   | University of Zurich |
| Model Name                | FT/IR-4100typeA      |
| Serial Number             | B079461016           |
| Accessory                 | ATR PRO410-S         |
| Accessory S/N             | A042261044           |
| Light Source              | Standard             |
| Detector                  | TGS                  |
| Accumulation              | 10                   |
| Resolution                | 4 cm-1               |
| Zero Filling              | On                   |
| Apodization               | Cosine               |
| Gain                      | Auto (32)            |
| Aperture                  | Auto (7.1 mm)        |
| Scanning Speed            | Auto (2 mm/sec)      |
| Filter                    | Auto (30000 Hz)      |

# UZH1a chiral chromatogram

## SAMPLE INFORMATION

|                   |                         |                     |                          |
|-------------------|-------------------------|---------------------|--------------------------|
| Sample Name:      | MC20-381-30-1P1-OM-E-D  | Acquired By:        | System                   |
| Sample Type:      | Unknown                 | Sample Set Name:    | 20210128 1               |
| Vial:             | 1:D,6                   | Acq. Method Set:    | 15 5% 40% ETOH DEA C2 OM |
| Injection #:      | 1                       | Processing Method:  | chiral sample            |
| Injection Volume: | 10.00 ul                | Channel Name:       | PDA Ch1 214nm@4.8nm      |
| Run Time:         | 8.0 Minutes             | Proc. Chnl. Descr.: | PDA Ch1 214nm@4.8nm      |
| Date Acquired:    | 2021-01-28 11:45:22 CST |                     |                          |
| Date Processed:   | 2021-01-28 12:51:09 CST |                     |                          |

## Auto-Scaled Chromatogram

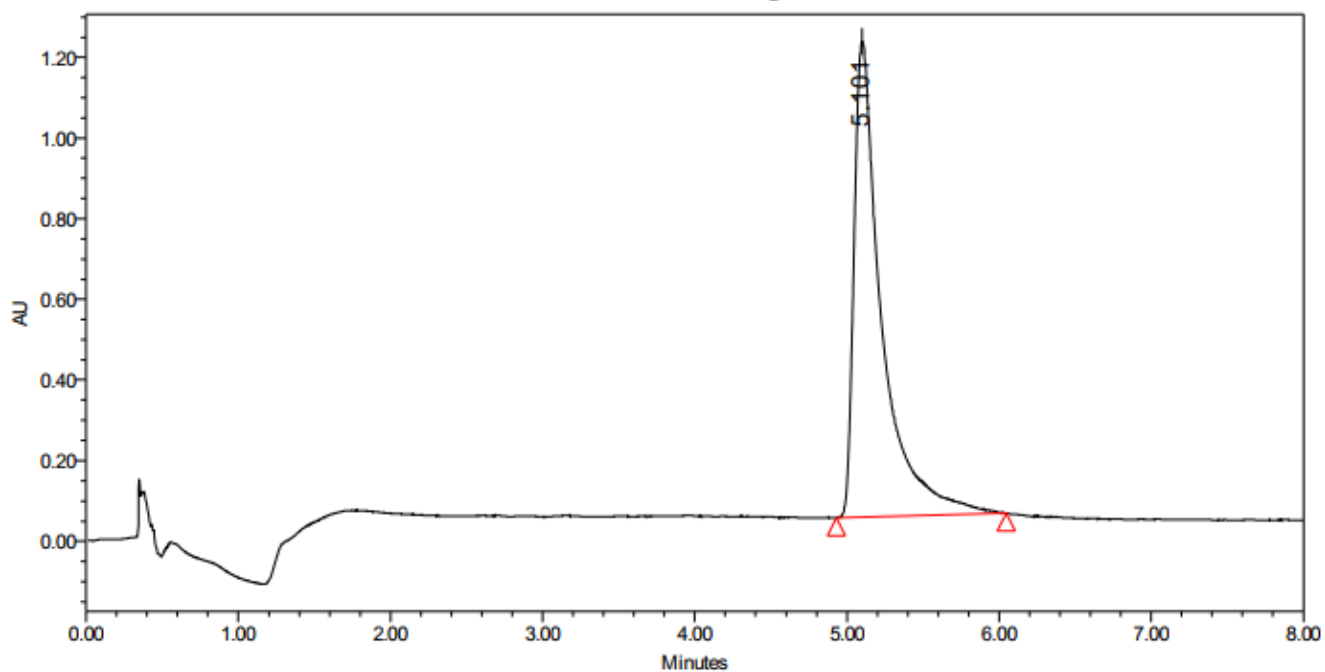

## Peak Results

|   | Retention Time (min) | Area ( $\mu\text{V}\cdot\text{sec}$ ) | % Area | Height ( $\mu\text{V}$ ) |
|---|----------------------|---------------------------------------|--------|--------------------------|
| 1 | 5.101                | 14857244                              | 100.00 | 1179895                  |

UZH1b chiral chromatogram

| SAMPLE INFORMATION |                         |                     |                          |
|--------------------|-------------------------|---------------------|--------------------------|
| Sample Name:       | MC20-381-30-1P2-OM-E-D  | Acquired By:        | System                   |
| Sample Type:       | Unknown                 | Sample Set Name:    | 20210128 1               |
| Vial:              | 1:D,7                   | Acq. Method Set:    | 15 5% 40% ETOH DEA C2 OM |
| Injection #:       | 1                       | Processing Method:  | chiral sample            |
| Injection Volume:  | 1.00 ul                 | Channel Name:       | PDA Ch1 214nm@4.8nm      |
| Run Time:          | 8.0 Minutes             | Proc. Chnl. Descr.: | PDA Ch1 214nm@4.8nm      |
| Date Acquired:     | 2021-01-28 12:43:42 CST |                     |                          |
| Date Processed:    | 2021-01-28 12:51:42 CST |                     |                          |

Auto-Scaled Chromatogram

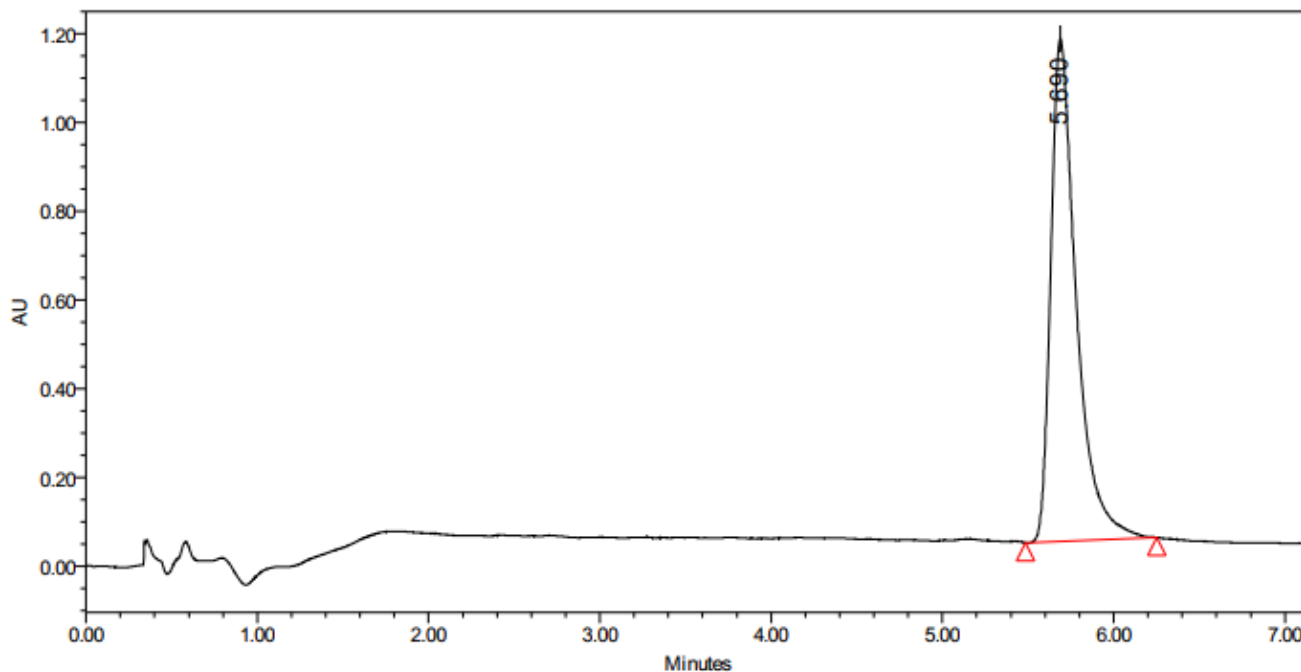

Peak Results

|   | Retention Time (min) | Area ( $\mu\text{V}\cdot\text{sec}$ ) | % Area | Height ( $\mu\text{V}$ ) |
|---|----------------------|---------------------------------------|--------|--------------------------|
| 1 | 5.690                | 11729630                              | 100.00 | 1132757                  |

## Materials

HEK293T cells were obtained from ATCC. MOLM-13 cells were a gift from Prof. W. Wei-Lynn Wong (University of Zurich). U2OS cells were a gift from Prof. Yang Shi (Harvard Medical School). Dulbecco's modified essential medium (DMEM) supplemented with 4.5 g/L glucose and GlutaMAX™, RPMI 1640 medium, Opti-MEM® medium, Dulbecco's phosphate buffered saline (DPBS), Gibco™ Fetal Bovine Serum, Gibco™ Penicillin-Streptomycin, 0.05% Trypsin-EDTA, nuclease-free water, and Lipofectamine® RNAiMAX were purchased from Thermo Fisher Scientific (Waltham, MA). Cell culture treated dishes, flasks, and multiwell plates were obtained from Corning Inc. (Corning, NY). Sera-Mag Oligo(dT)-coated magnetic particles were obtained from GE Healthcare (Chicago, IL). GENEzol™ reagent was purchased from Geneaid Biotech (New Taipei, Taiwan). Human METTL3 specific siRNAs and non-targeting siRNA as a negative control were purchased from Microsynth (Balgach, Switzerland). METTL3-siRNA-1 sense: 5'-GCACAUCCUACUCUUGUAAAdTdT-3', METTL3-siRNA-2 sense: 5'-GGAGAUCCUAGAGCUAUUAdTdT-3', METTL3-siRNA-3 sense: 5'-GACUGCUCUUCCUUAUAAdTdT-3', NC-siRNA sense: 5'-AGGUAGUGUAAUCGCCUUGdTdT-3'.<sup>1,2</sup> NEBuffer™ 2 and nucleoside digestion mix were obtained from NEB (Ipswich, MA). Adenosine, guanosine, 7-methylguanosine (m7G), and SYPRO Orange were purchased from Sigma-Aldrich (St. Louis, MO), N<sup>6</sup>-methyladenosine (m<sup>6</sup>A) from Chemie Brunschwig (Basel, Switzerland), 1-methyladenosine (m1A) from MedChem Express (NJ, USA), and N<sup>6</sup>-methyl-2'-O-methyladenosine (m<sup>6</sup>A<sub>m</sub>) from Toronto Research Chemicals (Toronto, Canada) as UPLC-MS/MS standards. Anti-METTL3 rabbit and anti-β-actin mouse antibodies were from Abcam (Cambridge, UK), IRDye® 800CW goat anti-rabbit IgG and IRDye® 680RD donkey anti-mouse IgG secondary antibodies were obtained from Li-COR Biosciences (Lincoln, NE). The protease inhibitor cocktail tablets were purchased from Roche (Basel, Switzerland). SurePAGE 12% Bis-Tris polyacrylamide gels were obtained from GenScript (NJ, USA).

## X-ray data collection and refinement statistics

| <b>PDB ID</b>                                    | 7ACD               |
|--------------------------------------------------|--------------------|
| <b>Compound</b>                                  | <b>UZH1a</b>       |
| <b>Data Collection</b>                           |                    |
| Space group                                      | P3 <sub>2</sub> 21 |
| Cell dimension a, b, c (Å)                       | 63.8, 63.8, 224.92 |
| Cell dimension $\alpha$ , $\beta$ , $\gamma$ (°) | 90, 90, 120        |
| Resolution (Å)                                   | 44.98 (2.5)        |
| Unique reflections*                              | 19248 (3051)       |
| Completeness*                                    | 99.9 (99.8)        |
| Redundancy*                                      | 9.72 (9.96)        |
| R <sub>merge</sub> *                             | 19.5 (139.2)       |
| CC (1/2)                                         | 99.6 (60.9)        |
| I/ $\sigma$ I                                    | 11.33 (1.7)        |
| <b>Refinement</b>                                |                    |
| R <sub>work</sub> /R <sub>free</sub>             | 0.1882/0.2259      |
| RMSD bond (Å)                                    | 0.009              |
| RMSD angle (°)                                   | 1.22               |
| B-factor (Å <sup>2</sup> ) **                    | 45.26/42.22/44.78  |
| Ramachandran Favored                             | 97.16              |
| Ramachandran Allowed                             | 2.61               |
| Ramachandran Disallowed                          | 0.23               |

\*Statistics for the highest resolution shell is shown in parentheses.

\*\* P/L/W indicate protein, ligand/ion and water molecules, respectively.

X-ray data collection and refinement statistics table
